# Supplementary material for: Fabrication of AIE-active amphiphilic fluorescent polymeric nanoparticles through host–guest interaction
Source: Royal Society of Chemistry journal article supplement (doi:10.1039/c6ra08677b), 2016-01-01
Supplement: c6ra08677b1.pdf [file c6ra08677b1.pdf]

Fabrication of AIE-active Amphiphilic Fluorescent Polymeric Nanoparticles through Host-guest  
Interaction

Junyu Chen<sup>a,#</sup>, Songsong Luo<sup>a,#</sup>, Dazhuang Xu<sup>a</sup>, Yun Xue<sup>a</sup>, Hongye Huang<sup>a</sup>, Qing Wan<sup>a</sup>, Meiyong Liu<sup>a,\*</sup>,  
Xiaoyong Zhang<sup>a,\*</sup>, Yen Wei<sup>b,\*</sup>

<sup>a</sup> Department of Chemistry, Nanchang University, 999 Xuefu Avenue, Nanchang 330031, China. <sup>b</sup>  
Department of Chemistry and the Tsinghua Center for Frontier Polymer Research, Tsinghua University,  
Beijing, 100084, P. R. China.

# These authors contributed equally to this work

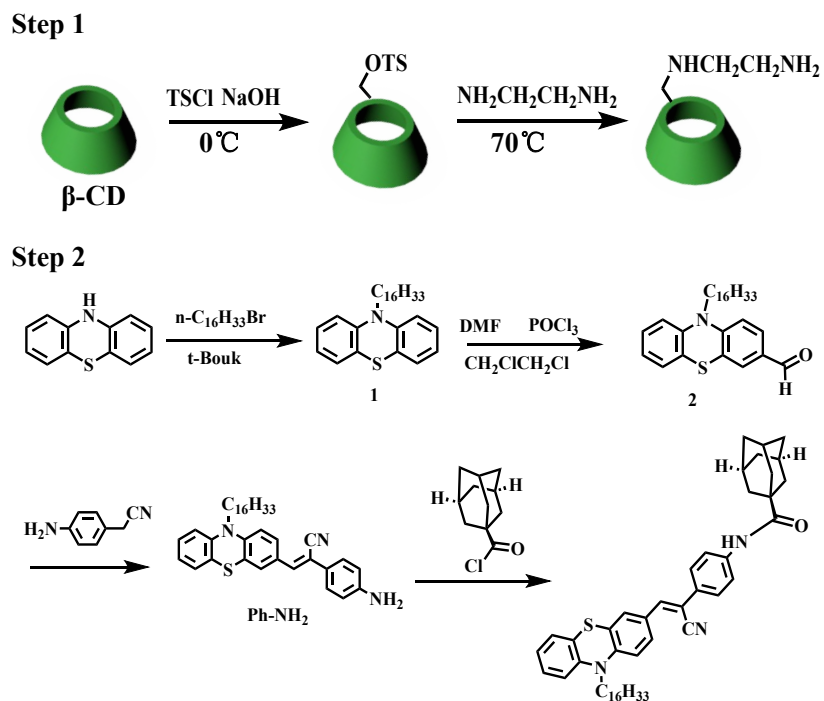

**Scheme S1** Synthetic routes of amino-terminated  $\beta$ -CD and Ad-PhNH<sub>2</sub>

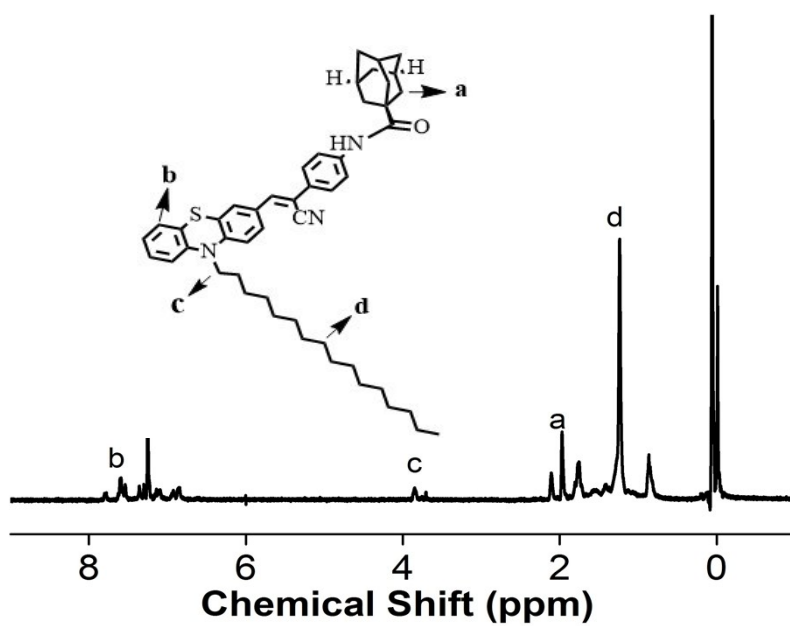

**Fig. S1** <sup>1</sup>H NMR spectrum of Ad-PhNH<sub>2</sub>

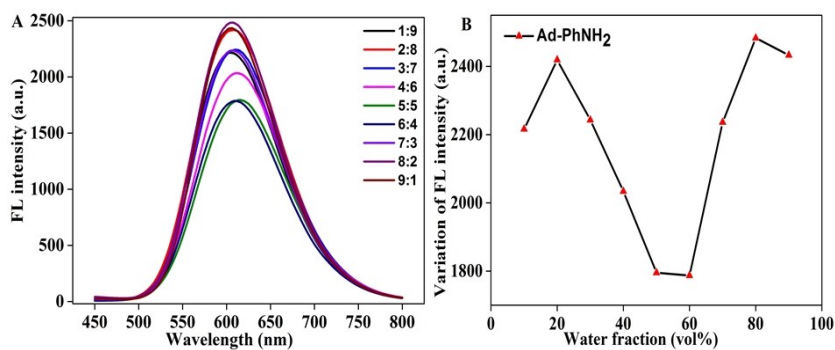

**Fig. S2** (A) The PL spectra Ad-PhNH<sub>2</sub> in water/THF (V/V) mixture with different water fraction; Ex = 432 nm. (B) The variation trend of Ad-PhNH<sub>2</sub> FL intensity in water/THF mixture with different water fraction.

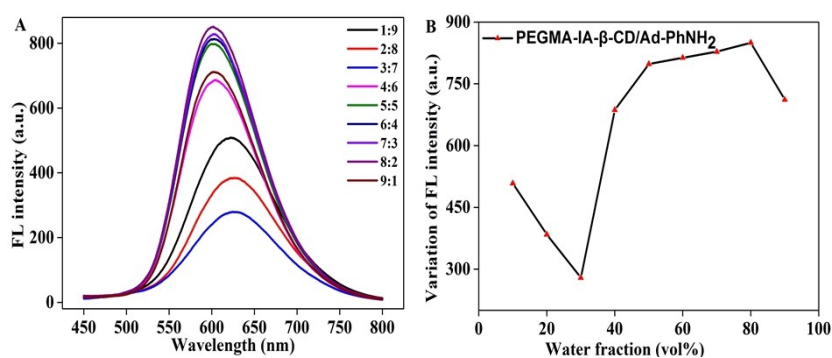

**Fig. S3** The PL spectra Ad-PhNH<sub>2</sub> in water/DMF (V/V) mixture with different water fraction; Ex = 432 nm. (B) The variation trend of Ad-PhNH<sub>2</sub> FL intensity in water/DMF mixture with different water fraction.

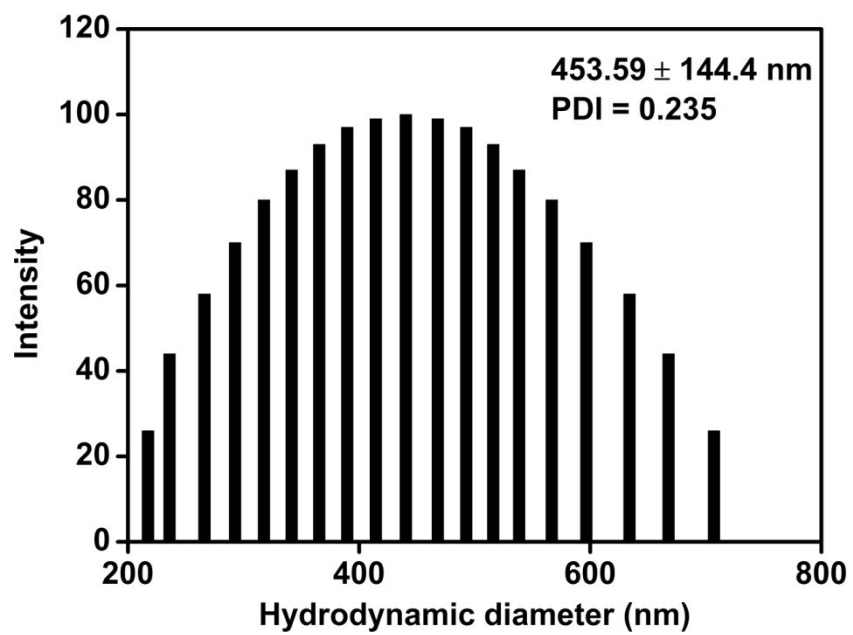

**Fig. S4** Size distribution of PEGMA-IA- $\beta$ -CD/Ad-PhNH<sub>2</sub> FPNs in water determined by DLS analysis.
